# Supplementary material for: A Multi-Site Study of Norovirus Molecular Epidemiology in Australia and New Zealand, 2013-2014
Source: PubMed Central journal article supplement (PMC4846056; doi:10.1371/journal.pone.0145254), 2016-04-26
Supplement: pone.0145254.s003.pdf [file pone.0145254.s003.pdf]

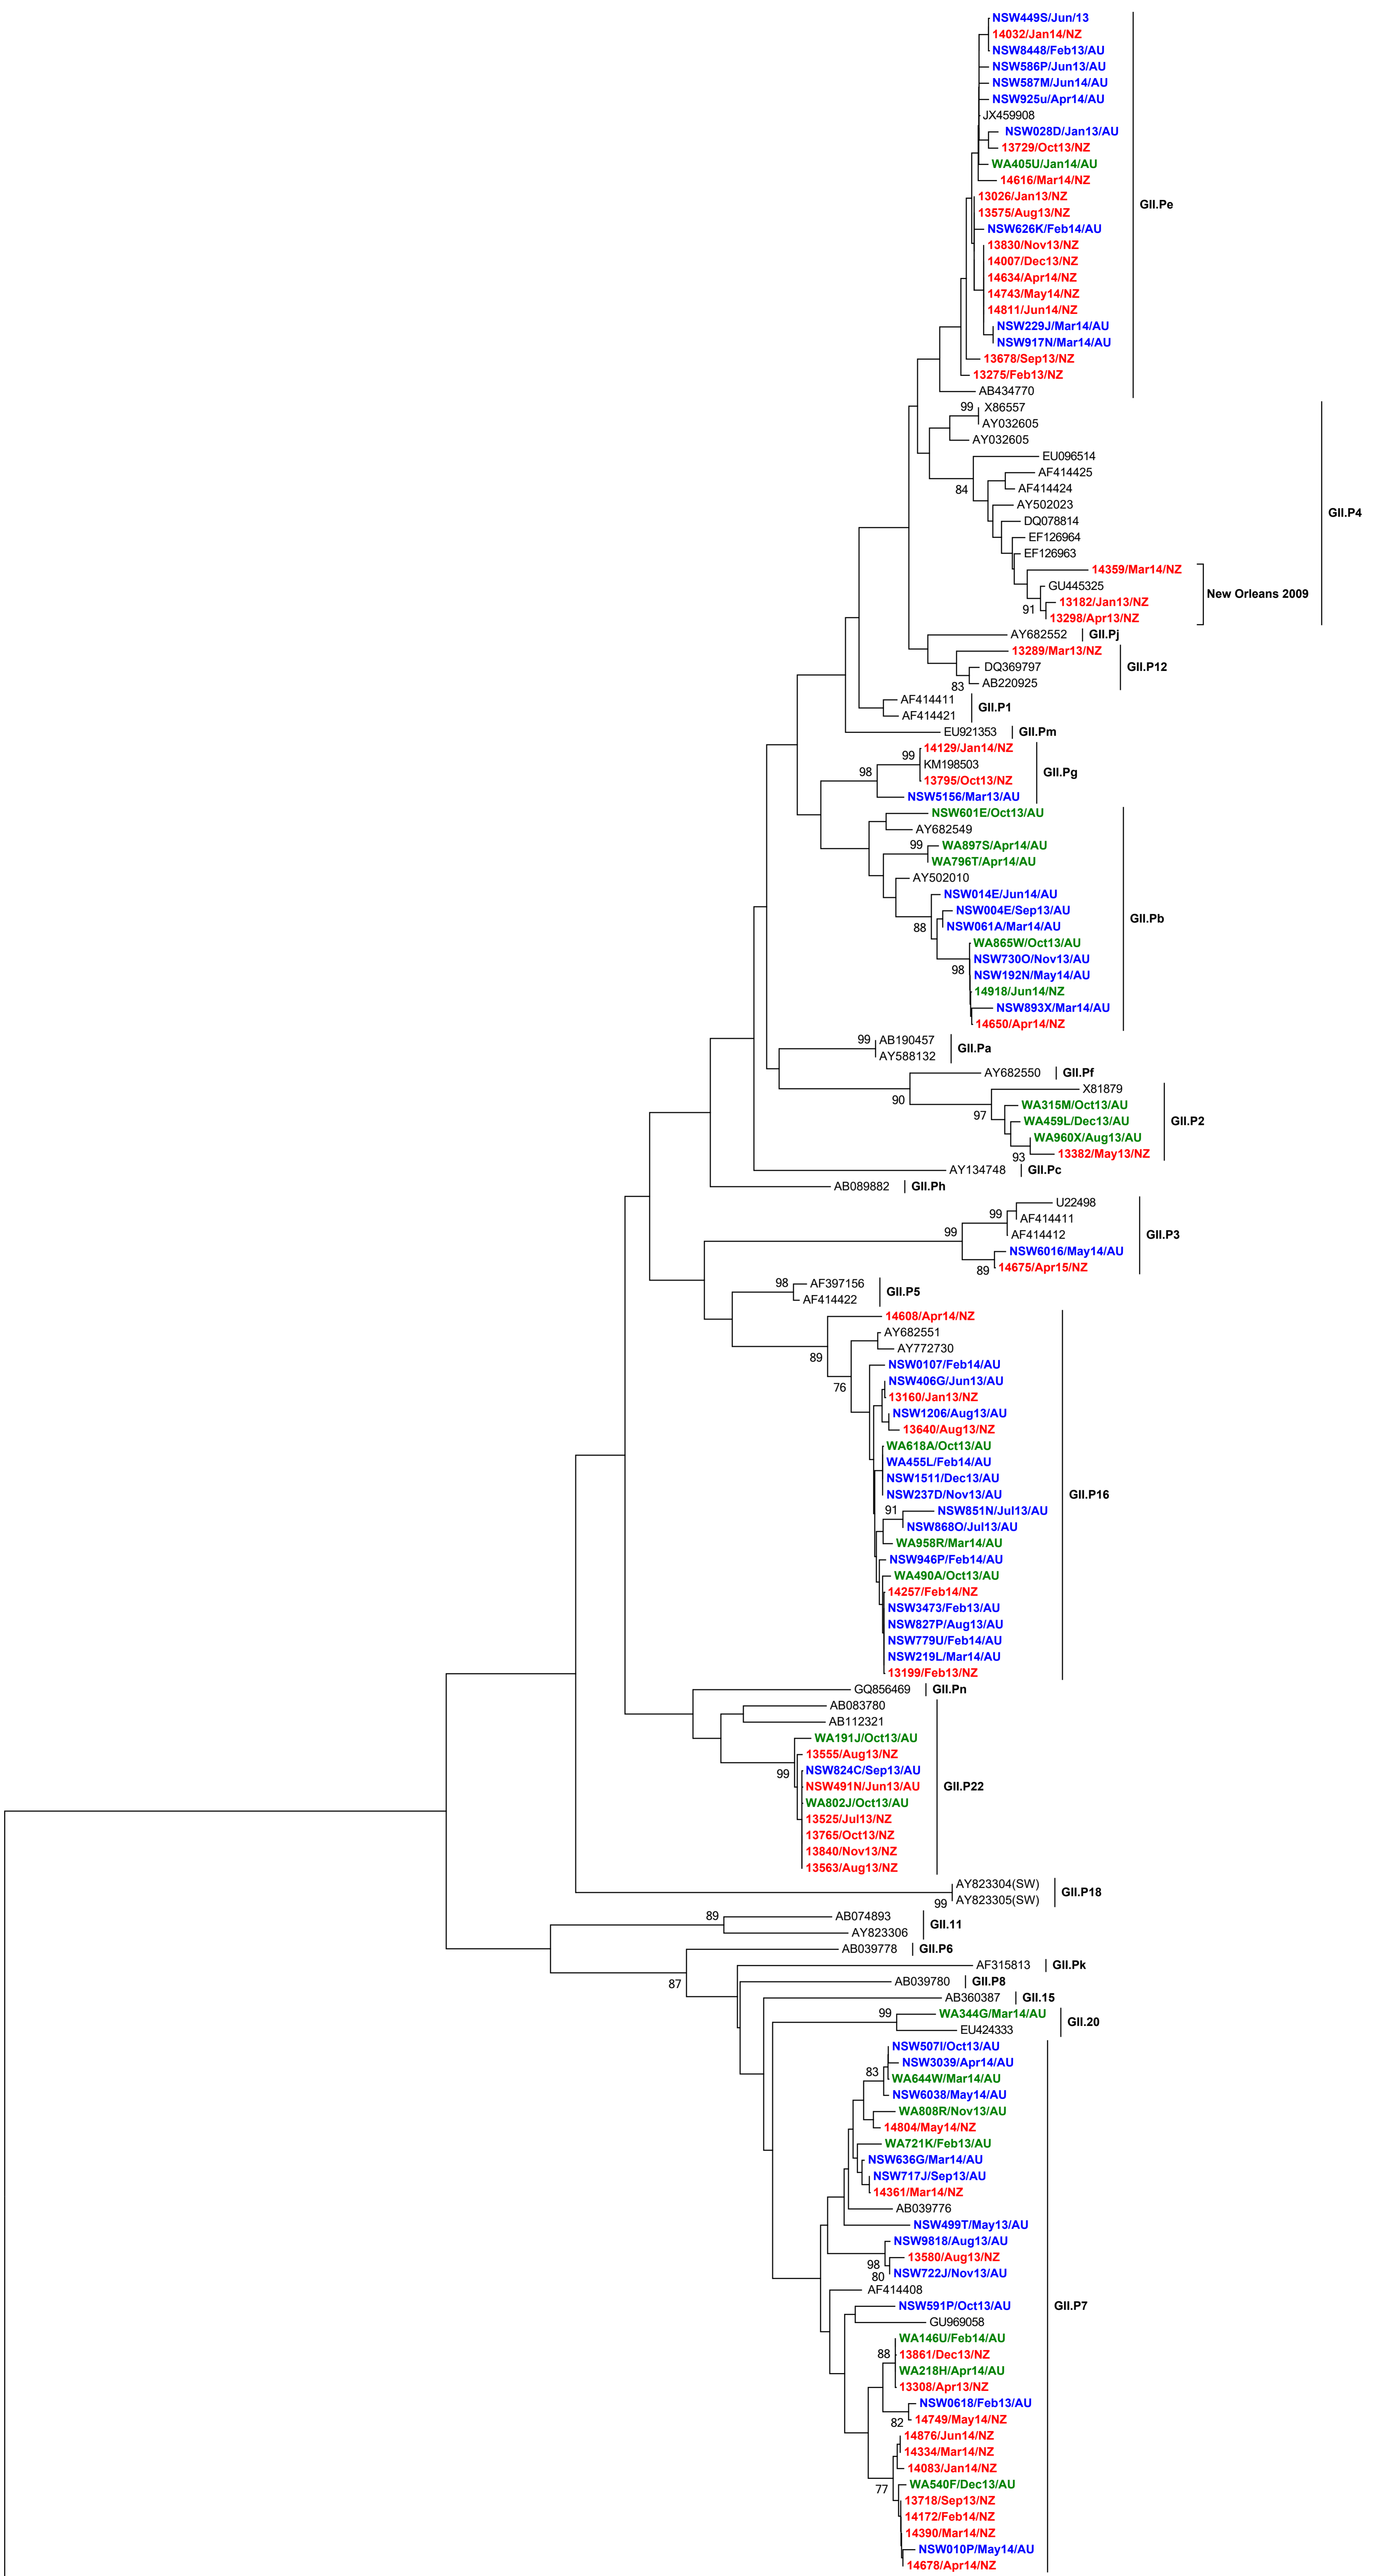

0.1
