# Supplementary material for: A Multi-Site Study of Norovirus Molecular Epidemiology in Australia and New Zealand, 2013-2014
Source: PubMed Central journal article supplement (PMC4846056; doi:10.1371/journal.pone.0145254), 2016-04-26
Supplement: pone.0145254.s004.pdf [file pone.0145254.s004.pdf]

**S1 Table. Reference NoVs used to construct phylogenetic trees in this study.**

| <b>GenBank Accession</b> | <b>Reference NoV<br/>(Host/genotype/strain identifier/collection<br/>year/country of origin)</b> |
|--------------------------|--------------------------------------------------------------------------------------------------|
| KF429765                 | Hu/GI.1/8W/1968/US                                                                               |
| KF306212                 | Hu/GI.2/Jingzhou2013401/2013/CHN                                                                 |
| AF145709                 | Hu/Stav/1995/NOR                                                                                 |
| EF547396                 | Hu/GI.3/Akabane991130-2258/1999/JPN                                                              |
| JN603244                 | Hu/GI.3/Lilla Edet S29/2008/SWE                                                                  |
| AB042808                 | Hu/GI.4/Chiba407/1987/JPN                                                                        |
| JN603273                 | Hu/GI.4/Lila Edet S45/2008/SWE                                                                   |
| AJ277614                 | Hu/GI.5/Musgrove/1989/UK                                                                         |
| JQ388274                 | Hu/GI.6/Kingston ACT160D/2010/AUS                                                                |
| AJ277615                 | Hu/GI.6/Sindlesham/1995/UK                                                                       |
| JN603265                 | Hu/GI.7/Lilla Edet S23/2008/SWE                                                                  |
| AJ277609                 | Hu/GI.7/Winchester/1994/UK                                                                       |
| AJ844469                 | Hu/GI.7/Chiba 030100/2003/JPN                                                                    |
| AF538679                 | Hu/GI.8/Boxer/2001/USA                                                                           |
| GU296356                 | Hu/GI.9/Lilla Edet p2/2008/SWE                                                                   |
| HQ637267                 | Hu/GI.9/Vancouver730/2004/CAN                                                                    |
| M87661                   | Hu/GI.1/Norwalk/1993/USA                                                                         |
| L07418                   | Hu/GI.2/Southampton/1993/UK                                                                      |
| AY038598                 | Hu/GI.P3/VA98115/1998/USA                                                                        |
| AF414402                 | Hu/GI.P4/New Orleans 66/1993/US                                                                  |
| AF414406                 | Hu/GI.5/Appalachicola Bay 318/1995/US                                                            |
| AF093797                 | Hu/GI.6/Norwalk/1997/DE                                                                          |
| JN603251                 | Hu/GI.7/Lila Edet S5b/2008/SWE                                                                   |
| GU299761                 | Hu/GI.8/2008890321/2008/US                                                                       |
| EF529737                 | Hu/GI.P9/Chatellerault709/2004/FR                                                                |
| U04469                   | Hu/GI.P9-GI.3/Desertm Shield DSV395/1993/US                                                      |
| AB081723                 | Hu/GI.Pb/WUG1/2002/JPN                                                                           |
| AB039774                 | Hu/GI.Pc-GI.5/SzUG1/2002/JPN                                                                     |
| EF529738                 | Hu/GI.Pd/Vesoul576/2003/FR                                                                       |
| AB187514                 | Hu/GI.Pf-GI.3/Otofuke/1979/JPN                                                                   |
| AY580335                 | Hu/GII.1/Courdon78/2000/FR                                                                       |
| AY919139                 | Hu/GII.1/Picton/2003/AU                                                                          |
| U07611                   | Hu/GII.1/Hawaii/1971/US                                                                          |
| AF414421                 | Hu/GII.P1-GII.1/Port Canaveral 301/1994/US                                                       |
| AF414411                 | Hu/GII.P1-GII.3/Lionville 247/1993/US                                                            |
| DQ366347                 | Hu/GII.2/OsakaNI/2004/JPN                                                                        |
| X81879                   | Hu/GII.P2-GII.2/Melksham/UK                                                                      |
| AB242258                 | Hu/GII.3/78Ru/2004/JPN                                                                           |
| GU980585                 | Hu/GII.3/CBNU1/2006/KOR                                                                          |
| U02030                   | Hu/GII.3/TV24/1993/US                                                                            |

| <b>GenBank Accession</b> | <b>Reference NoV<br/>(Host/genotype/strain identifier/collection<br/>year/country of origin)</b> |
|--------------------------|--------------------------------------------------------------------------------------------------|
| AF414412                 | Hu/GII.P3/New Orleans 279/1994/US                                                                |
| U22498                   | Hu/GII.P3-GII.3/MX/US                                                                            |
| AB303932                 | Hu/GII.4/DenHaag001/2003/NL                                                                      |
| AB445395                 | Hu/GII.4/Apeldoorn317/2007/NL                                                                    |
| EU876890                 | Hu/GII.4/Dijon-E1057/2002/FR                                                                     |
| FJ514242                 | Hu/GII-4/CUK-3/2008/KR                                                                           |
| GQ845367                 | Hu/GII-4/Orange/NSW001P/2008/AU                                                                  |
| HQ009513                 | Hu/GII.4/JB-15/2008/KR                                                                           |
| JQ613517                 | Hu/GII.4/WA210Z/2007/AU                                                                          |
| JX629458                 | Hu/GII.4/Hong Kong CUHK3655/2012/CH                                                              |
| KC175323                 | Hu/GII.4/Hong Kong CUHK3630/2012/CH                                                              |
| AF414424                 | Hu/GII.4/MiamiBeach326/1995/US                                                                   |
| AF414425                 | Hu/GII.4/Burwash Landing 331/1995/US                                                             |
| AY032605                 | Hu/GII.4/MD145-12/1987/US                                                                        |
| AY502023                 | Hu/GII.4/Farmington Hills/2002/US                                                                |
| DQ078814                 | Hu/GII.4/Hunter504D 04O/2004/AU                                                                  |
| EF126963                 | Hu/GII.4/Yerseke38/2006/NL                                                                       |
| EF126964                 | Hu/GII.4/Terneuzen70/2006/NL                                                                     |
| EU096514                 | Hu/GII.4/Kapuvár3029/2007/HUN                                                                    |
| GU445325                 | Hu/GII.4/New Orleans1805/2009/US                                                                 |
| JX459908                 | Hu/GII.4/Sydney/NSW514/2012/AU                                                                   |
| X76716                   | Hu/GII.4/Bristol/1993/UK                                                                         |
| X86557                   | Hu/GII.4/Lordsdale/1995/UK                                                                       |
| AB212306                 | Hu/GII.5/Hokkaido 133/2003/JPN                                                                   |
| AF414423                 | Hu/GII.5/White River/290/1994/US                                                                 |
| AJ277607                 | Hu/GII.5/Hillingdon/90/UK                                                                        |
| AF397156                 | Hu/GII.P5-GII.5/MOH/1999/US                                                                      |
| AF414422                 | Hu/GII.P5-GII.5/New Orleans 306/1994/US                                                          |
| AF414410                 | Hu/GII.6/Miami/292/1994/US                                                                       |
| AJ277620                 | Hu/GII.6/Seacroft/1990/UK                                                                        |
| HM633213                 | Hu/GII.6/Shizuoka 8913/2008/JPN                                                                  |
| AB039778                 | Hu/GII.P6-GII.6/Saitama U16/JPN                                                                  |
| AF414409                 | Hu/GII.7/Gwynedd 273/1994/US                                                                     |
| AJ277608                 | Hu/GII.7/Leeds/1990/UK                                                                           |
| AB039776                 | Hu/GII.P7-GII.6/Saitama U3/JPN                                                                   |
| AF414408                 | Hu/GII.P7-GII.6/Maltimore 274/1993/US                                                            |
| AF195848                 | Hu/GII.8/Amsterdam 98-18/1998/NL                                                                 |
| AB039780                 | Hu/GII.P8-GII.8/Saitama U25/JPN                                                                  |
| AY038599                 | Hu/GII.9/VA97207/1997/US                                                                         |
| AF427118                 | Hu/GII.10/Erfurt 546/2000/DE                                                                     |
| AY237415                 | Hu/GII.10/Mc37/2003/JPN                                                                          |
| AB074893                 | Sw/GII.11/Sw918/1997/JP                                                                          |

| <b>GenBank Accession</b> | <b>Reference NoV<br/>(Host/genotype/strain identifier/collection<br/>year/country of origin)</b> |
|--------------------------|--------------------------------------------------------------------------------------------------|
| AY823306                 | Sw/GII.P11-GII.19/OH-QA170/2003/US                                                               |
| AB039775                 | Hu/GII.12/Saitama U1/2002/JPN                                                                    |
| AB044366                 | Hu/GII.12/Hiroshima 9912-02F/1999/JPN                                                            |
| AJ277618                 | Hu/GII.12/Wortley/90/UK                                                                          |
| AB220925                 | Hu/GII.P12-GII.4/Chiba/04-974/2004/JP                                                            |
| DQ369797                 | Hu/GII.P12-GII.4/Guangzhou NVgz01/CH                                                             |
| GU969058                 | Hu/GII.13/Maizuru 8679/2008/JPN                                                                  |
| AY113106                 | Hu/GII.13/Fayetteville/1998/US                                                                   |
| AY682548                 | Hu/GII.13/Pont de Roide 671/2004/FR                                                              |
| AY130761                 | Hu/GII.14/M7/1999/US                                                                             |
| AY130762                 | Hu/GII.15/J23/1999/US                                                                            |
| AB360387                 | Hu/GII.P15/Hiroshima 66-1110/2006/JPN                                                            |
| AY772730                 | Hu/GII.P16/Neustrelitz260/2000/DE                                                                |
| AY682551                 | Hu/GII.P16-GII.16/VannesL23/1999/FR                                                              |
| AB983218                 | Hu/GII.P17-GII.17/Kawasaki323/2014/JPN                                                           |
| AY502009                 | Hu/GII.17/CS-E1/2002/US                                                                          |
| AY823305                 | Sw/GII.P18/OH-QW125/2003/US                                                                      |
| AY823304                 | Sw/GII.P18/GII.18/OH-QW101/2003/US                                                               |
| EU424333                 | Hu/GII.P20/Leverkusen267/2005/DE                                                                 |
| AB542917                 | Hu/GII.20/OC07118/2007/JPN                                                                       |
| EU373815                 | Hu/GII.20/Luckenwalde591/2002/DE                                                                 |
| AY675554                 | Hu/GII.21/IF1998/2003/Iraq                                                                       |
| EU019230                 | Hu/GII.21/Ahm PC03/2006/IND                                                                      |
| AY682549                 | Hu/GII.P21/Pont de Roide 673/2004/FR                                                             |
| AY502010                 | Hu/GII.P21-GII.16/Tiffin/1999/US                                                                 |
| AB112321                 | Hu/GII.P22/Saitama T66eGII/02/JPN                                                                |
| AB083780                 | Hu/GII.P21-GII.21/Yuri/JPN                                                                       |
| AB190457                 | Hu/GII.Pa/SN2000JA/JPN                                                                           |
| AY588132                 | Hu/GII.Pa/Sydney 2212/2003/AU                                                                    |
| AY134748                 | Hu/GII.Pc-GII.2/Snow Mountain/US                                                                 |
| AB434770                 | Hu/GII.Pe-GII.4/OC07138/2007/JPN                                                                 |
| AY682550                 | Hu/GII.Pf-GII.5/S63/1999/FR                                                                      |
| KM198503                 | Hu/GII.Pg/C2033/2010/UK                                                                          |
| GQ845370                 | Hu/GII.g-GII.12/StGeorge/NSW199U/2008/AU                                                         |
| AB089882                 | Hu/GII.Ph/OC97007/1997/JPN                                                                       |
| AY682552                 | Hu/GII.Pj-GII.2/Crete E3/1997/FR                                                                 |
| AF315813                 | Hu/GII.Pk/OC96065/1996/JPN                                                                       |
| EU921353                 | Hu/GII.Pm/Pune PC24/2006/IND                                                                     |
| GQ856469                 | Hu/GII.Pn/Beijing853931/2007/CH                                                                  |
| EU794907                 | Bo/GIII/B309/2003/BEL                                                                            |

Host: Hu – Human; Sw – Swine; Bo – Bovine

Country: US – BEL – Belgium; CAN – Canada; CHN – China; DE – Germany; FR – France;  
HUN – Hungary; IND – India; JPN – Japan; KOR – Korea; NL – Netherlands; NOR – Norway;  
SWE – Sweden; UK – United of Kingdoms and US – Unite of Sates;
